# Supplementary material
Source: publisher site journal article supplement (https://static.cambridge.org/content/id/urn:cambridge.org:id:article:S0033822219000298/resource/name/S0033822219000298supp001.doc)
Supplement: Supplementary file 1 [file S0033822219000298supp001.doc]

| Sample name | modelled/IRMS  δ13C  of the binder  ‰ | Sample type, environmental condition | Location within site | Relative chronology  BC/AD |
| --- | --- | --- | --- | --- |
| 61H | -9.8/-9.3 | mortar, open-air | façade of the pastophorium northern wall | 5/6 or 7/8AD |
| 76H | -15.54/- | Mortar, air-hardening | floor of the first step of the wine press tank, N of the pastophorium | 8AD |
| 151,2H | -15.13/- | plaster with  composition similar to mortars (not finishing one) | second out of four layers of plaster in the tank of the wine press, to the north of the pastophorium | 8AD??? |
| A1/H | -15.32/-15.35 | plaster  with composition similar to mortar | NE church, plaster from the apse | 6AD of the building?  6-8th for the plaster? |
| 14H | -16.70/-17.4 | hydraulic mortar | “floor pour” (a layer of the floor made to level uneven concrete floors) of a channel exposed at the chancel area | 1BC/1AD |
| 80H | -21.61/-21.68 | plaster/mortar – mortar type material used to finish the tomb interior, humid conditions, colder temperature | Interior of the tomb, in “mortuary room” | 5/6AD |
| 5H | -23,8/- | mortar,  humid conditions, lower temperature | cistern in the church atrium, material from its inner wall | 5/6AD or 7/8AD?? |

Supplement 1.

Given “IRMS δ13C of the binder” it is an average value calculated on the basis on measurements presents in Table 1. Only the results from sample A1/>100 was not taken to mean value calculations, because of too coarse fraction (>100 μm, Table 1).

All presented mortars, beside 14H (hydraulic), are air-hardening ones.

Samples 14H, 80H and 5H comes from locations with limited airflow. The sampling was conducted with special consideration to the depth in the wall; for comparison, the δ13C for finishing, pure carbonate plaster devoid of any aggregates, with empty spaces after straw, 10H is from -10.35 to -9.5‰ (Michalska Nawrocka et al., 2007).
